# Supplementary material
Source: PubMed Central journal article supplement (PMC3350366)

## Figure Legends

**Figure S1. Effect of panobinostat (LBH589) and everolimus (RAD001) depending on the dose in HL cell lines.** (A) Cells were incubated with diluent control, LBH589 (0.02-1  $\mu$ M), RAD001 (0.1  $\mu$ M) or the combination of LBH589 and RAD001 and after 24 hours, cell viability was determined by an MTS assay and the dose-effect curves were determined using the Calcuin software. Data represents the mean of three independent experiments performed in triplicate. (B) Combination index values for LBH589 plus RAD001 in HL cells lines after 24hours. Values <1 indicate synergy.

**Figure S2. Effects of panobinostat (LBH589) and everolimus (RAD001) combination on apoptosis in HL cell lines.** HL cell lines were incubated for 48 hours with diluent control, LBH589 (0.02-0.1  $\mu$ M), RAD001 (0.1  $\mu$ M) or the combination of LBH589 and RAD001 and, intracellular protein levels were examined by Western blot. LBH589 induced cleavages of caspase 9, and PARP and, decreased XIAP level in all cell lines, whereas RAD001 had no effect on these proteins.

**Figure S3. Effects of panobinostat (LBH589) and everolimus (RAD001) combination on cytokine secretion in HL cell lines.** Cells were incubated with diluent control or LBH589 (0.02-0.1  $\mu$ M), RAD001 (0.1  $\mu$ M) or the combination of LBH589 and RAD001 and after 48 hours, supernatants were examined for cytokine levels using a multiplex assay. (A) Heatmap of the cytokine concentration data transformed in log<sub>2</sub> for all 3 HL cell lines. The data is normalized and presented in reference to the mean value of all points (5 pg/ml). Thus, red color indicates values > 5 pg/ml, and green color represent values < 5 pg/ml. As shown, all cell lines produced low concentrations of IL10, EGF, Eotaxin, IL1-beta, IL4, IL2, and interferon gamma. The blue, green and red bars on top of the figure denote different cell lines. (B) Effect of drug treatment on the level of 30 cytokines in the HL cell lines. Data presented in reference to base line concentration (DSMO-treated) of each cytokine, which is shown in black color. Red color indicates an incres in cytokine level above baseline, and green color indicates a decrease in cytokine level below the base line. The colored bars on top of each panel indicate different treatment conditions.

**Figure S4. Effects of higher doses of panobinostat (LBH589) and everolimus (RAD001) combination on STATs activation in HL cell lines.** Cells were incubated with diluent control or LBH589 (0.5  $\mu$ M), RAD001 (0.5  $\mu$ M) or the combination of LBH589 and RAD001 and after 48 hours, cell lysates were prepared and resolved by SDS-PAGE, transferred to nitrocellulose membrane and probed with anti-phospho-STAT3, anti-STAT3, anti-phospho-STAT5, anti-STAT5, anti-phospho-STAT6 and anti-STAT6 antibodies. Higher concentrations of LBH589 was more potent than lower concentrations (Figure 5B) in inhibiting STAT3 phosphorylation Figure S5.

**Figure 5. Effects of panobinostat (LBH589) on STATs activation in 2 other HL cell lines, L-540 and HD-MyZ.** (A) Cells were incubated with diluent control or LBH589 (0.1  $\mu$ M), RAD001 (0.1  $\mu$ M) or the combination of LBH589 and RAD001 and after 12, 24 and 48 hours, cell lysates were prepared and resolved by SDS-PAGE, transferred to nitrocellulose membrane and probed with anti-phospho-STAT3 (Tyr 705), anti-STAT3, anti-phospho-STAT5 (Tyr 694), anti-STAT5,

anti-phospho-STAT6 (Tyr 641), anti-STAT6 and anti-beta actin antibodies. (B) Cells were incubated with diluent control or LBH589 (0.1  $\mu$ M), and after 48 hours, supernatants were examined for TNF-alpha levels.

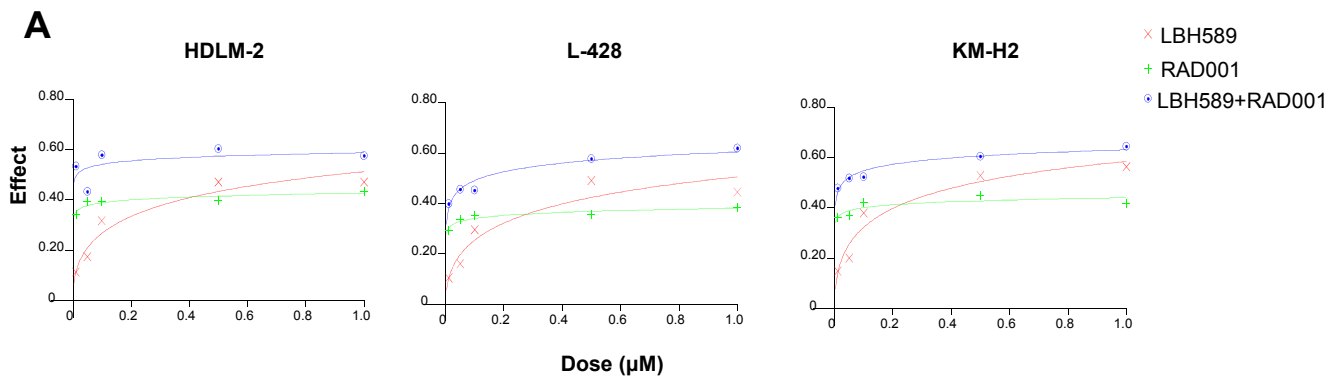

**B**

| LBH589<br>( $\mu\text{M}$ ) | RAD001<br>( $\mu\text{M}$ ) | Combination index |       |       |
|-----------------------------|-----------------------------|-------------------|-------|-------|
|                             |                             | HDLM-2            | L-428 | KM-H2 |
| 0.01                        | 0.01                        | 0.01              | 0.03  | 0.03  |
| 0.05                        | 0.05                        | 0.14              | 0.08  | 0.09  |
| 0.1                         | 0.1                         | 0.06              | 0.16  | 0.1   |
| 0.5                         | 0.5                         | 0.22              | 0.27  | 0.42  |
| 1                           | 1                           | 0.57              | 0.38  | 0.58  |

**Fig. S1**

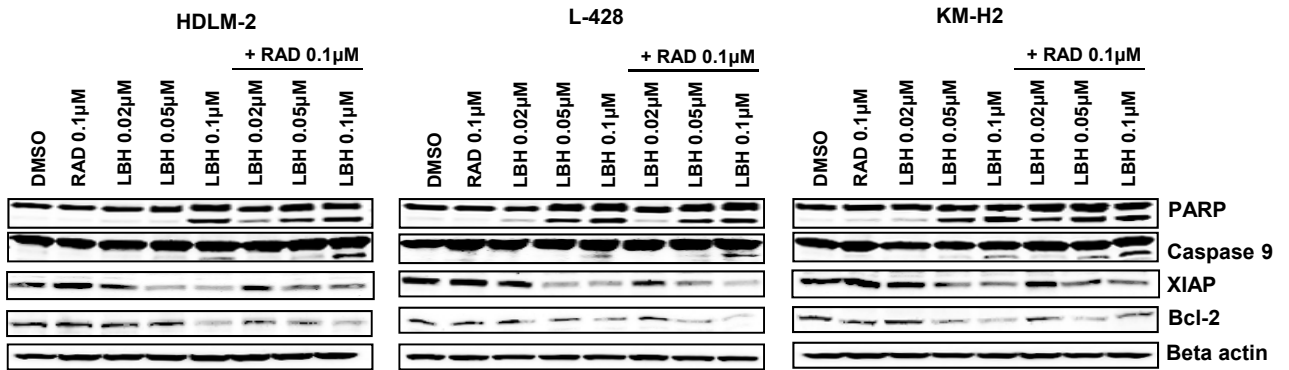

**Fig. S2**

**A**

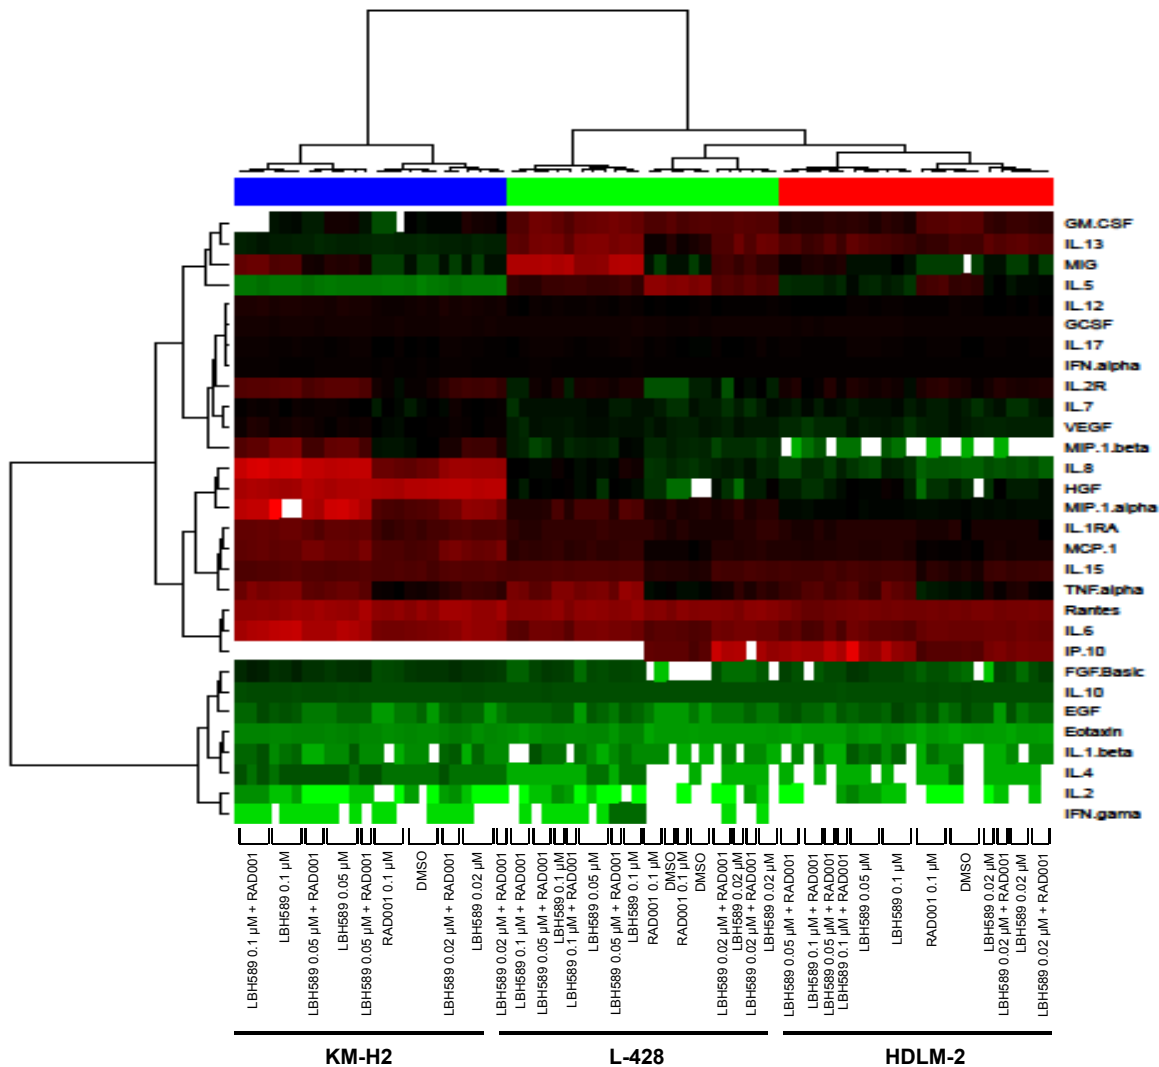

**B**

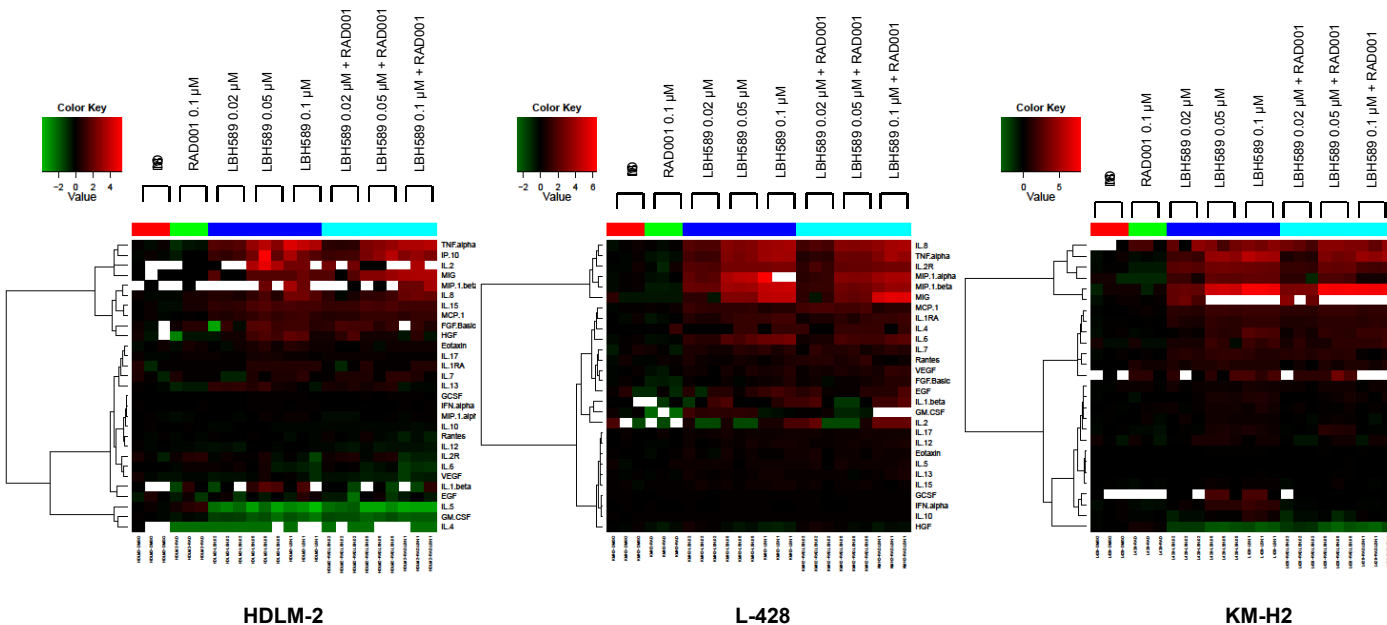

HDLM-2

L-428

KM-H2

**Fig. S3**

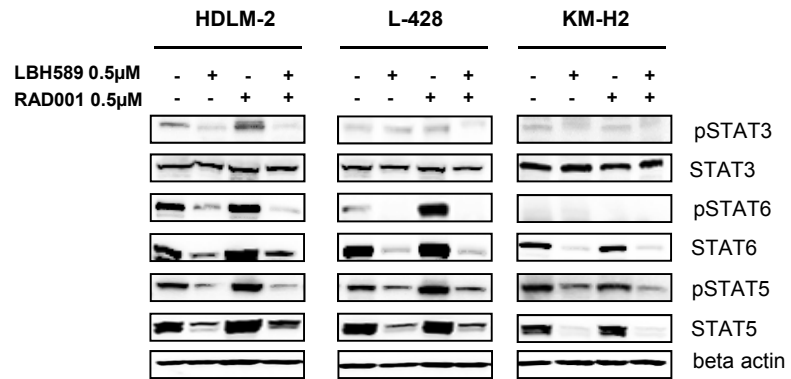

**Fig. S4**

**A**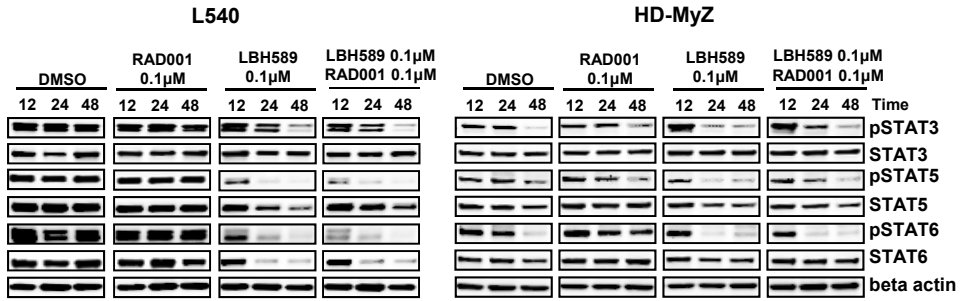**B**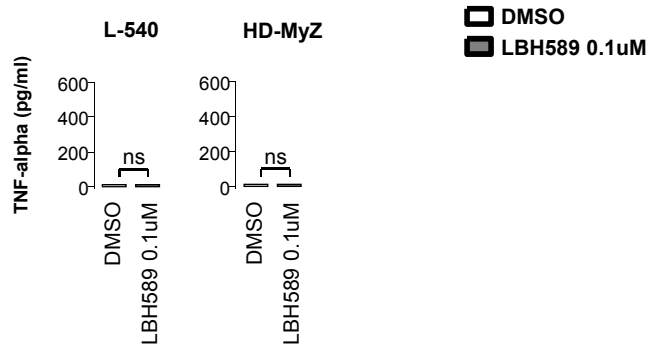

Supplement: supp_blood-2011-01-331421_blood-2011-01-331421-1.pdf [file supp_blood-2011-01-331421_blood-2011-01-331421-1.pdf]
